# Supplementary material
Source: PubMed Central journal article supplement (PMC10524145)
Supplement: NIHMS1886857-supplement-1.pdf [file NIHMS1886857-supplement-1.pdf]

## Supplemental Tables

**Supplemental Table 1. Features Included in the Neighborhood Environmental Vulnerability Index**

| Domain                                                                          | Subdomain Represented by Slice<br>(Number of Features,<br>Weight of Overall Index) | Features                                                                                                                                                                                                                  |
|---------------------------------------------------------------------------------|------------------------------------------------------------------------------------|---------------------------------------------------------------------------------------------------------------------------------------------------------------------------------------------------------------------------|
| <b>Demographics</b><br>(7 subdomains,<br>12 features)                           | Age<br>(2 features, 1/28)                                                          | <ul style="list-style-type: none"> <li>• Age under 18 (%)</li> <li>• Age 65 or older (%)</li> </ul>                                                                                                                       |
|                                                                                 | Female-led household<br>(1 feature, 1/28)                                          | <ul style="list-style-type: none"> <li>• Female-led households (%)</li> </ul>                                                                                                                                             |
|                                                                                 | Immigration<br>(4 features, 1/28)                                                  | <ul style="list-style-type: none"> <li>• Speak English "not at all" or "not well" (%)</li> <li>• Foreign-born (%)</li> <li>• Entered U.S. 2010 or later (%)</li> <li>• Not a U.S. citizen (%)</li> </ul>                  |
|                                                                                 | Disability<br>(1 feature, 1/28)                                                    | <ul style="list-style-type: none"> <li>• With a disability (%)</li> </ul>                                                                                                                                                 |
|                                                                                 | Single Parent Households<br>(1 feature, 1/28)                                      | <ul style="list-style-type: none"> <li>• Children (age younger than 18) living with one parent (%)</li> </ul>                                                                                                             |
|                                                                                 | Mobility<br>(2 features, 1/28)                                                     | <ul style="list-style-type: none"> <li>• Who take public transportation, taxicab, bicycle, walking, or other non-automobile means (%)</li> <li>• Aggregate travel time to work</li> </ul>                                 |
|                                                                                 | Social Isolation<br>(1 feature, 1/28)                                              | <ul style="list-style-type: none"> <li>• Live alone (%)</li> </ul>                                                                                                                                                        |
| <b>Economic Indicators</b><br>(6 subdomains,<br>7 features)                     | Income and poverty<br>(2 features, 1/24)                                           | <ul style="list-style-type: none"> <li>• Household Income (median)</li> <li>• Income in past 12 months below poverty level (%)</li> </ul>                                                                                 |
|                                                                                 | Occupation<br>(1 feature, 1/24)                                                    | <ul style="list-style-type: none"> <li>• Work in service, natural resources, construction, maintenance, production, transportation, or material moving occupations (%)</li> </ul>                                         |
|                                                                                 | Income inequality<br>(1 feature, 1/24)                                             | <ul style="list-style-type: none"> <li>• Gini Index of income inequality</li> </ul>                                                                                                                                       |
|                                                                                 | Unemployment<br>(1 feature, 1/24)                                                  | <ul style="list-style-type: none"> <li>• Unemployed among those in labor force aged 20-64 (%)</li> </ul>                                                                                                                  |
|                                                                                 | Education<br>(1 feature, 1/24)                                                     | <ul style="list-style-type: none"> <li>• With less than high school education (%)</li> </ul>                                                                                                                              |
|                                                                                 | Vehicle availability<br>(1 feature, 1/24)                                          | <ul style="list-style-type: none"> <li>• % with no vehicle available (%)</li> </ul>                                                                                                                                       |
| <b>Residential Characteristics and Density</b><br>(7 subdomains,<br>8 features) | Population Density<br>(1 feature, 1/28)                                            | <ul style="list-style-type: none"> <li>• Population per square mile (%)</li> </ul>                                                                                                                                        |
|                                                                                 | Group Quarters<br>(1 feature, 1/28)                                                | <ul style="list-style-type: none"> <li>• Live in group quarters (%)</li> </ul>                                                                                                                                            |
|                                                                                 | Occupants per room<br>(1 feature, 1/28)                                            | <ul style="list-style-type: none"> <li>• More than one occupant per room (%)</li> </ul>                                                                                                                                   |
|                                                                                 | Age of housing structure<br>(1 feature, 1/28)                                      | <ul style="list-style-type: none"> <li>• Age of housing in 2019 (years)</li> </ul>                                                                                                                                        |
|                                                                                 | Units in housing structure<br>(2 features, 1/28)                                   | <ul style="list-style-type: none"> <li>• Living in structure with 1 attached housing unit, 2 or more units, or in a mobile home, boat, RV, or van (%)</li> <li>• Living in structure with 20 or more units (%)</li> </ul> |
|                                                                                 | Changing residence<br>(1 feature, 1/28)                                            | <ul style="list-style-type: none"> <li>• Moved in the past year (%)</li> </ul>                                                                                                                                            |
|                                                                                 | Housing vacancy<br>(1 feature, 1/28)                                               | <ul style="list-style-type: none"> <li>• Vacancy (%)</li> </ul>                                                                                                                                                           |

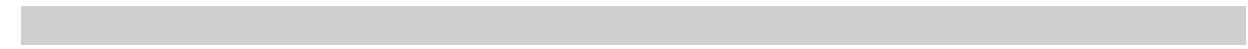

|                                                                                                               |                                              |                                                                                                                                                                                                                                                                                                                                                                                                                                                                                                                                                                                                                                                                                                                        |
|---------------------------------------------------------------------------------------------------------------|----------------------------------------------|------------------------------------------------------------------------------------------------------------------------------------------------------------------------------------------------------------------------------------------------------------------------------------------------------------------------------------------------------------------------------------------------------------------------------------------------------------------------------------------------------------------------------------------------------------------------------------------------------------------------------------------------------------------------------------------------------------------------|
| <b>Health Behaviors,<br/>Outcomes, Prevention<br/>Practices, and Access</b><br>(4 subdomains,<br>27 features) | Unhealthy behaviors<br>(4 features, 1/16)    | <ul style="list-style-type: none"> <li>• Currently smoke*</li> <li>• Binge drink*</li> <li>• Have no leisure-time physical activity*</li> <li>• Sleep for less than 7 hours per day*</li> </ul>                                                                                                                                                                                                                                                                                                                                                                                                                                                                                                                        |
|                                                                                                               | Health outcomes<br>(14 features, 1/16)       | <ul style="list-style-type: none"> <li>• High blood pressure, 2017*</li> <li>• High blood pressure medication use, among those with high blood pressure, 2017*</li> <li>• Obesity*</li> <li>• Cancer, non-skin*</li> <li>• Current asthma*</li> <li>• Coronary heart disease*</li> <li>• Stroke*</li> <li>• COPD*</li> <li>• Diabetes*</li> <li>• High cholesterol, 2017*</li> <li>• Chronic Kidney Disease*</li> <li>• Mental health not good for &gt;=14 days*</li> <li>• Physical health not good for &gt;=14 days*</li> <li>• All teeth lost*</li> </ul>                                                                                                                                                           |
|                                                                                                               | Prevention practices<br>(8 features, 1/16)   | <ul style="list-style-type: none"> <li>• Routine checkup within past year*</li> <li>• Adult men aged 65 or older who are on date with clinical preventive services (flu shot past year, PPV shot ever, colorectal cancer screening)*</li> <li>• Adult women aged 65 or older who are on date with clinical preventive services (flu shot past year, PPV shot ever, colorectal cancer screening, mammogram within past 2 years)*</li> <li>• Visit to dentist or dental clinic*</li> <li>• Cervical cancer screening among women aged 21-65*</li> <li>• Cholesterol screening, 2017*</li> <li>• Colonoscopy screening among adults aged 50-75 years*</li> <li>• Mammography use among women aged 50-74 years*</li> </ul> |
|                                                                                                               | Health insurance access<br>(1 feature, 1/16) | <ul style="list-style-type: none"> <li>• Lack of health insurance*</li> </ul>                                                                                                                                                                                                                                                                                                                                                                                                                                                                                                                                                                                                                                          |

**Data sources:** U.S. Census American Community Survey (ACS) 2015-2019 5-year estimates, Centers for Disease Control and Prevention (CDC) 2020 data release from the PLACES Project, NEVI repository<sup>59</sup>

\*Unless noted, crude prevalence estimates were used from models among adults aged 18 or older in 2018.
